# A tutorial on Bayesian parameter inference for dynamic energy budget models

*Philipp H. Boersch-Supan<sup>A,B,C,1</sup> and Leah R. Johnson<sup>D,2</sup>*

*February 3, 2018*

<sup>A</sup>*Department of Geography, University of Florida, Gainesville, FL 32611, USA*

<sup>B</sup>*Emerging Pathogens Institute, University of Florida, Gainesville, FL 32610, USA*

<sup>C</sup>*Department of Integrative Biology, University of South Florida, Tampa, FL 33610, USA*

<sup>D</sup>*Department of Statistics, Virginia Polytechnic Institute and State University, Blacksburg, VA 24061, USA*

<sup>1</sup>*pboesu@gmail.com - ORCID ID 0000-0001-6723-6833*

<sup>2</sup>*lrjohn@vt.edu - ORCID ID 0000-0002-9922-579X*

## 1 Abstract

Mechanistic representations of individual life-history trajectories are powerful tools for the prediction of organismal growth, reproduction and survival under novel environmental conditions. Dynamic energy budget (DEB) theory provides compact models to describe the acquisition and allocation of organisms over their full life cycle of bioenergetics. However, estimating DEB model parameters, and their associated uncertainties and covariances, is not trivial. Bayesian inference provides a coherent way to estimate parameter uncertainty, and propagate it through the model, while also making use of prior information to constrain the parameter space. We outline a Bayesian inference approach for energy budget models and provide two case studies – based on a simplified DEBkiss model, and the standard DEB model – detailing the implementation of such inference procedures using the open-source software package deBInfer. We demonstrate how DEB and DEBkiss parameters can be estimated in a Bayesian framework, but our results also highlight the difficulty of identifying DEB model parameters which serves as a reminder that fitting these models requires statistical caution.

**Key words:** dynamic energy budget theory, parameter identifiability, informative priors

## 1 Introduction

Dynamic energy budget (DEB) theory (Kooijman, 2010) provides a powerful and well tested framework to describe the acquisition and use of energy by individual organisms over their entire life cycle. The standard DEB model is built on rules inherent to the process of resource uptake and allocation by all heterotrophs. It is a compact model that is able to describe the full life cycle bioenergetics of a living animal (Kooijman, 2010). DEB models are used as tools to address both fundamental and applied questions in ecology, e.g. about metabolic scaling (Maino et al., 2014), life-history strategies (Kooijman, 2013), in ecotoxicology (Jager et al., 2006; Jager and Zimmer, 2012), or as components of population models (Martin et al., 2012; Smallegange et al., 2017).

25 Because of strong correlations between individual parameters, simultaneous parameter inference  
26 for DEB models is not trivial. The difficulty of estimation is by no means unique to DEB models,  
27 but is commonly encountered in dynamic systems models across scientific disciplines (Aster et al.,  
28 2011; Brewer et al., 2008; Johnson and Briggs, 2011). Parameter inference for DEB model param-  
29 eters themselves is routinely based on a non-linear least squares regression approach, the so-called  
30 covariation method (Lika et al., 2011). The covariation method makes use of constraints on param-  
31 eters that follow from theory (Lika et al., 2014, 2011), as well as by reducing the effective number  
32 of parameters by the use of so-called pseudo data: canonical fixed values for certain parameters  
33 which enter the estimation procedure with low weights. This approach has been successfully used  
34 to parameterize DEB models for over 1000 species. However, one drawback of the method is that  
35 uncertainty estimates of parameters are not readily available. Furthermore, while the DEB litera-  
36 ture acknowledges the importance of biological variability (e.g. Lika et al., 2014), input data are  
37 treated as known without error for the purposes of the parameter estimation. While measurement  
38 error for many observable traits used to parameterize DEB models may indeed be small, trait data  
39 often exhibits heterogeneity between individuals of a species, which would be expected to reflect  
40 individual heterogeneity in the underlying metabolic parameters. Given the potential of DEB the-  
41 ory as a building block for population models, we feel these are important hurdles to overcome, so  
42 more value can be added to DEB-based population models by incorporating both better estimates  
43 of parameter uncertainty, and a better reflection of individual variability.

44 In contexts where quantification of uncertainty in parameters is desired, the Bayesian inference  
45 framework offers multiple advantages. First, multiple sources of uncertainty can be accounted for.  
46 Second, the use of informative priors can constrain the parameter space to biologically sensible  
47 outcomes while allowing fairly straightforward assessment of the influence of the prior information.  
48 Finally, the implementation of hierarchical models which allow inferences about both individual and  
49 population heterogeneity, as well as partial information pooling across individuals, is conceptually  
50 straightforward (Gelman et al., 1996).

51 Bayesian parameter inference for DEB models has been demonstrated by Johnson et al. (2013).  
52 However, until recently, general inference for these models in a Bayesian framework has required  
53 that the practitioner be able to implement the full inference procedure, from the differential equation  
54 model specification through to the sampler used to obtain posterior draws. Here, we present a  
55 tutorial for the estimation of model parameters for dynamic energy budget models using the open-  
56 source R package `deBInfer` (Boersch-Supan et al., 2017) which makes the approach simpler to  
57 implement. We present this tutorial using two case studies. The first is based on a DEBkiss model,  
58 a simplified bioenergetic model that builds on DEB theory Jager et al. (2013). We follow this with  
59 a case study based on the standard DEB model. In each case study we discuss how the model is  
60 implemented and the approach estimate parameters. The R and C code needed to reproduce all of  
61 the analyses are available as supplementary materials.

## 62 **2 Basics of the Bayesian Approach**

63 Bayesian approaches for parameter estimation in complex, nonlinear models are being applied with  
64 increasing frequency to a broad range of biological models (e.g. Coelho et al., 2011; Voyles et al.,  
65 2012; Johnson et al., 2013; Smith et al., 2015). Here we very briefly explain the rationale behind  
66 the approach. Further details on the statistical background and software implementation can be  
67 found in the literature, (e.g. Clark, 2007; Gelman et al., 2003; Hobbs and Hooten, 2015; Johnson

68 et al., 2013; Boersch-Supan et al., 2017).

69 In the Bayesian approach the model, and in particular its parameters, are viewed as random vari-  
70 ables. In contrast, the data, once observed, are treated as fixed. This approach to parameter  
71 inference is attractive, as it provides a coherent framework that allows the incorporation of uncer-  
72 tainty in the observation process and model parameters, and it relaxes the assumption of normal  
73 errors that is inherent in least-squares fitting. It provides us not only with full posterior probabili-  
74 ty distributions describing the parameters, but also with posterior distributions for any quantity  
75 derived from the parameters, including the model trajectories. Further, the Bayesian framework  
76 naturally lets us incorporate prior information about the parameter values and examine the sensi-  
77 tivity of our inferences to this incorporated information. This is particularly useful in the context  
78 of DEB theory, where there are known biological and theoretical constraints on parameters (Lika  
79 et al., 2011, 2014; Johnson et al., 2013). For example, many biological quantities, such as body size,  
80 are strictly non-negative, and most DEB parameters have at least one well defined bound, e.g. the  
81 allocation fraction  $\kappa$  is bounded on the interval  $[0,1]$ . Using informative priors can help constrain  
82 the parameter space, aiding with parameter identifiability.

83 The purpose of our case studies is to show how to estimate the posterior probability distribution  
84 of the parameters of an energy budget model  $\mathcal{M}$ , given an empirical dataset  $\mathcal{Y}$ , and accounting for  
85 the uncertainty in the data. The model takes the general form

$$\mathcal{M} \equiv \frac{d\mathbf{x}}{dt} = \mathbf{f}(\mathbf{x}_t, t, \boldsymbol{\theta}) \quad (1)$$

86 where  $\mathbf{x}$  is a vector of state variables evolving with time;  $\mathbf{f}$  is a functional operator that takes a  
87 time input and a vector of continuous functions  $\mathbf{x}_t(\boldsymbol{\theta})$  and generates the vector  $\frac{d\mathbf{x}}{dt}$  as output; and  
88  $\boldsymbol{\theta}$  denotes a set of parameters.

89 Using Bayes' Theorem (Hobbs and Hooten, 2015) we can calculate the posterior distribution of the  
90 model parameters, given the data and the prior information as

$$\Pr(\boldsymbol{\theta}|\mathcal{Y}) = \frac{\Pr(\mathcal{Y}|\boldsymbol{\theta}) \Pr(\boldsymbol{\theta})}{\int \Pr(\mathcal{Y}|\boldsymbol{\theta}) \Pr(\boldsymbol{\theta}) d\boldsymbol{\theta}} \quad (2)$$

91 where  $\Pr()$  denotes a probability,  $\mathcal{Y}$  denotes the data, and  $\boldsymbol{\theta}$  denotes the set of model parameters.  
92 The product in the numerator is the *joint distribution*, which is made up of the *likelihood*  $\Pr(\mathcal{Y}|\boldsymbol{\theta})$   
93 or  $\mathcal{L}(\mathcal{Y}|\boldsymbol{\theta})$ , which gives the probability of observing  $\mathcal{Y}$  given the deterministic model  $\mathcal{M}(\boldsymbol{\theta})$ , and the  
94 *prior distribution*  $\Pr(\boldsymbol{\theta})$ , which represents the knowledge about  $\boldsymbol{\theta}$  before the data were collected.

95 Closed form solutions for the posterior are practically impossible to obtain for complex non-linear  
96 models such as DEB models, but they can be approximated numerically, e.g. by using Markov  
97 Chain Monte Carlo (MCMC) integration methods (Gilks et al., 1995).

## 98 2.1 Computation using the deBInfer package

99 The `deBInfer` package (Boersch-Supan et al., 2017) provides templates for implementing dynamical  
100 models consisting of a deterministic differential equation (DE) model and a stochastic observation  
101 model and subsequently for performing inference for these models. To perform inference, R functions  
102 or data structures must be specified to represent both the dynamical (here bioenergetic) model and  
103 the observation model (i.e., the data likelihood). Further, all model and observation parameters

104 must be declared, including prior distributions for those parameters that are to be estimated or  
105 values for those that are fixed. The DE model itself can also be provided as a shared object, e.g. a  
106 compiled C function, which can considerably speed up inference (see Appendix S3 in Boersch-Supan  
107 et al., 2017). `deBInfer` then samples from the posterior distributions of parameters via MCMC,  
108 specifically using Metropolis-Hastings updates nested within a Gibbs sampler (Brooks et al., 2011).  
109 As each sample of the posterior distribution is obtained, the differential equation model must be  
110 solved numerically within the MCMC procedure.

### 111 3 Case Study 1: DEBKiss Model

112 The standard DEB model is a powerful framework to describe the bioenergetics of an organism  
113 across its full life cycle (Kooijman, 2010). However, that power comes at a cost of many complex  
114 equations with many parameters needing a great deal of data to parameterize properly. In an effort  
115 to develop a simpler model that still exhibits important features of the full DEB Theory Jager  
116 et al. (2013) developed the DEBKiss model. It is a model inspired by DEB but “with a strong  
117 focus on the KISS principle” (Jager et al., 2013). The main departures from DEB are the absence  
118 of a reserve buffer and a maturation state variable. This has the effect of reducing the number  
119 of differential equations in the system, as well as reducing the number of parameters. The model  
120 is slightly less flexible. For instance, the organism must mature at a fixed length or weight. In  
121 contrast, the DEB framework allows maturation to happen once sufficient complexity has been  
122 accrued, which can correspond to a different weights or lengths in organisms living in differing food  
123 environments.

124 We use the DEBKiss model as a simplified DEB-like model to show the the basics of the Bayesian  
125 approach to fitting models of this sort. We perform inference using the same data set used in  
126 the paper introducing DEBKiss: data on growth and reproduction of the pond snail, *Lymnaea*  
127 *stagnalis*. These data come from a series of part of partial life experiments. Juvenile snails that  
128 were the same age (113 days from when the egg was laid) and approximately the same size were  
129 selected and followed for an additional 140 days (Figure 1, (data from Zimmer et al., 2012)). The  
130 reproduction and length data were originally from different experiments, but we treat them together  
131 here, following Jager et al. (2013). To keep this example especially simple use data from a single  
132 food level treatment, specifically snails that were fed ad libitum over the course of the experiment.  
133 Further, we only estimate a subset of the parameters estimated in the original DEBKiss paper  
134 (which were, in turn, a subset of all of the parameters) as not all parameters are simultaneously  
135 identifiable at a single food level. The model is specified and described in detail in both the main  
136 and supplementary text of Jager et al. (2013), so we do not re-produce the equations here. However,  
137 the complete implementation of the model in R, including the inference shown here, is included as  
138 supplementary materials.

#### 139 3.1 Bayesian Parameter Estimation

140 For simplicity, we focus on estimating a subset of parameters from data on snail growth and  
141 reproduction at a single food level. The DEBKiss model was implemented as a set of differential  
142 equations following (Jager et al., 2013). Similarly to the standard DEB model, the state variables  
143 in the DEBKiss framework are not all directly measurable. However, it is possible to specify how  
144 measured quantities, such as length and numbers of eggs, are related to the state variables. For

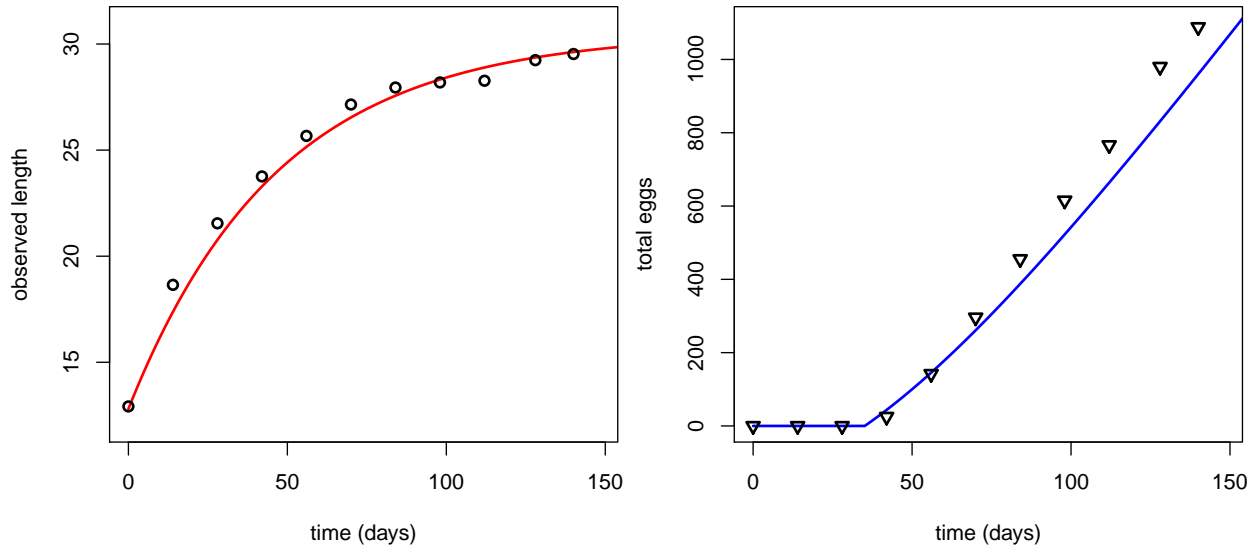

Figure 1: Snail growth and reproduction data (from Zimmer et al., 2012) plotted with predictions from the DEBKiss model (based on parameters from Jager et al., 2013).

145 this application, we used the formulation of the DEBKiss equations in terms of physical length and  
 146 cumulative number of eggs produced by the snails.

### 147 Likelihood

148 Once the differential equations have been specified, the likelihood of the data conditional on the  
 149 parameters and model must next be specified. The `deBInfer` package allows substantial flexibility  
 150 in the probability distributions that may be used for this purpose. For instance, one could allow  
 151 Normal errors for lengths and truncated or log-normal, or Poisson for eggs. This allows the user to  
 152 choose an appropriate distribution that is consistent with the characteristics of the data the user  
 153 wishes to model. The snail data we use here consists of average lengths (mm) and mean cumula-  
 154 tive eggs. Thus both the lengths and eggs are appropriately modeled as continuous distributions.  
 155 Additionally both are constrained to be positive and have error that increases over time (as small  
 156 differences between individuals is likely to be magnified as the grow).

157 To define our likelihood, we must relate our measured quantities to the model outputs. We assume  
 158 that the observed length,  $\tilde{L}$ , is the product of two quantities: the predicted physical length from the  
 159 DEBKiss model, denoted as  $L_w$  and a log-normally distributed, multiplicative noise term. Thus:

$$\tilde{L}(t) = L_w(t)\epsilon_L \text{ with } \log \epsilon_L \sim \mathcal{N}(0, \sigma_L^2). \quad (3)$$

160 Similarly, the resources allocated to reproduction,  $W_R$ , are related to the number of eggs. However,  
 161 the number of eggs created depend on the energy needed per egg,  $W_{B0}$ , and the conversion efficiency  
 162 of assimilated energy to egg,  $y_{BA}$ . Again, the noise is assumed to be multiplicative and log-normal,  
 163 so the cumulative egg production at any given time,  $F$ , is given by

$$F(t) = \frac{W_R(t)y_{BA}}{W_{B0}}\epsilon_E \text{ with } \log \epsilon_E \sim \mathcal{N}(0, \sigma_E^2). \quad (4)$$

164 Conditional on the solution to the underlying differential equations we assume that the observed  
 165 lengths and eggs are independent at each time. Thus the likelihood is constructed by multiplying  
 166 the (independent) likelihoods of the lengths and fecundity at each time point together.

### 167 Priors and sampling details

168 We chose relatively un-informative priors for the four parameters that we chose to estimate. The  
 169 choice of prior here was primarily guided by simple constraints on the values that the parameters  
 170 may take. For example,  $\kappa$ , the proportion of energy directed towards growth processes, must lie  
 171 between 0 and 1. Thus we used a uniform prior over this full range as the prior. Priors for estimated  
 172 parameters are specified in Table 1.

Table 1: Prior distributions used for parameter inference in the DEBKiss model.

| parameter        |                      | prior distribution | parameters                | reasoning                                                                          |
|------------------|----------------------|--------------------|---------------------------|------------------------------------------------------------------------------------|
| $\kappa$         | <code>kappa</code>   | Uniform            | $a = 0; b = 0$            | bounded on $[0,1]$                                                                 |
| $\ln(J_M^v)$     | <code>logJMv</code>  | normal             | $\mu = 0; \sigma^2 = 100$ | weakly informative prior, constraining the untransformed parameter to be positive. |
| $\ln \epsilon_L$ | <code>sdlog.L</code> | lognormal          | $\mu = 0; \sigma^2 = 1$   | weakly informative prior regularizing towards 0                                    |
| $\ln \epsilon_E$ | <code>sdlog.E</code> | lognormal          | $\mu = 0; \sigma^2 = 1$   | weakly informative prior regularizing towards 0                                    |

173 In addition to a prior distribution, the user must specify a *proposal* distribution for each parameter  
 174 being sampled (Gilks et al., 1995). This distribution determines how new values of each parameter  
 175 are chosen as the MCMC algorithm progresses. In the `deBInfer` package one can choose between  
 176 3 options: 1) a random walk proposal with a normal proposal distribution centered at the current  
 177 accepted parameter value; 2) a random walk proposal with a uniform distribution that is asymmetric  
 178 around the current accepted value; 3) independent draws from the prior distribution. In the example  
 179 here we chose all random walk proposals. For  $\kappa$  and  $\ln(J_M^v)$  we used a normal proposal. For the  
 180 two standard deviations we used the asymmetric uniform proposals. This latter is especially good  
 181 for sampling parameters that are bounded on the left with values that may be close to that lower  
 182 bound.

## 183 3.2 DEBKiss Model: Results

### 184 MCMC Output Diagnostics

185 When examining the posterior output from the MCMC produced by `deBInfer`, the first step is  
 186 always to check for *mixing* and *convergence* of the MCMC chain by plotting traces of the chains  
 187 (e.g., Figure 2). A “good”, well behaved chain (i.e., that mixes adequately and that has converged  
 188 to the posterior distribution) is sometimes described as resembling a “fuzzy caterpillar”. A chain  
 189 that doesn’t look very fuzzy is often called a “sticky” chain – it has high auto-correlation and the  
 190 effective sample size is low. If the chain has converged a horizontal line should approximately go  
 191 through the center of the trace and there shouldn’t be major patterns, such as a linear trend, visible.  
 192 The chains for this example appear to be well behaved, and seem to indicate both adequate mixing

193 and convergence. The subtleties of assessing mixing and convergence is beyond the scope of this  
194 paper, but may be found in textbooks such as Gilks et al. (1995) or Hobbs and Hooten (2015).

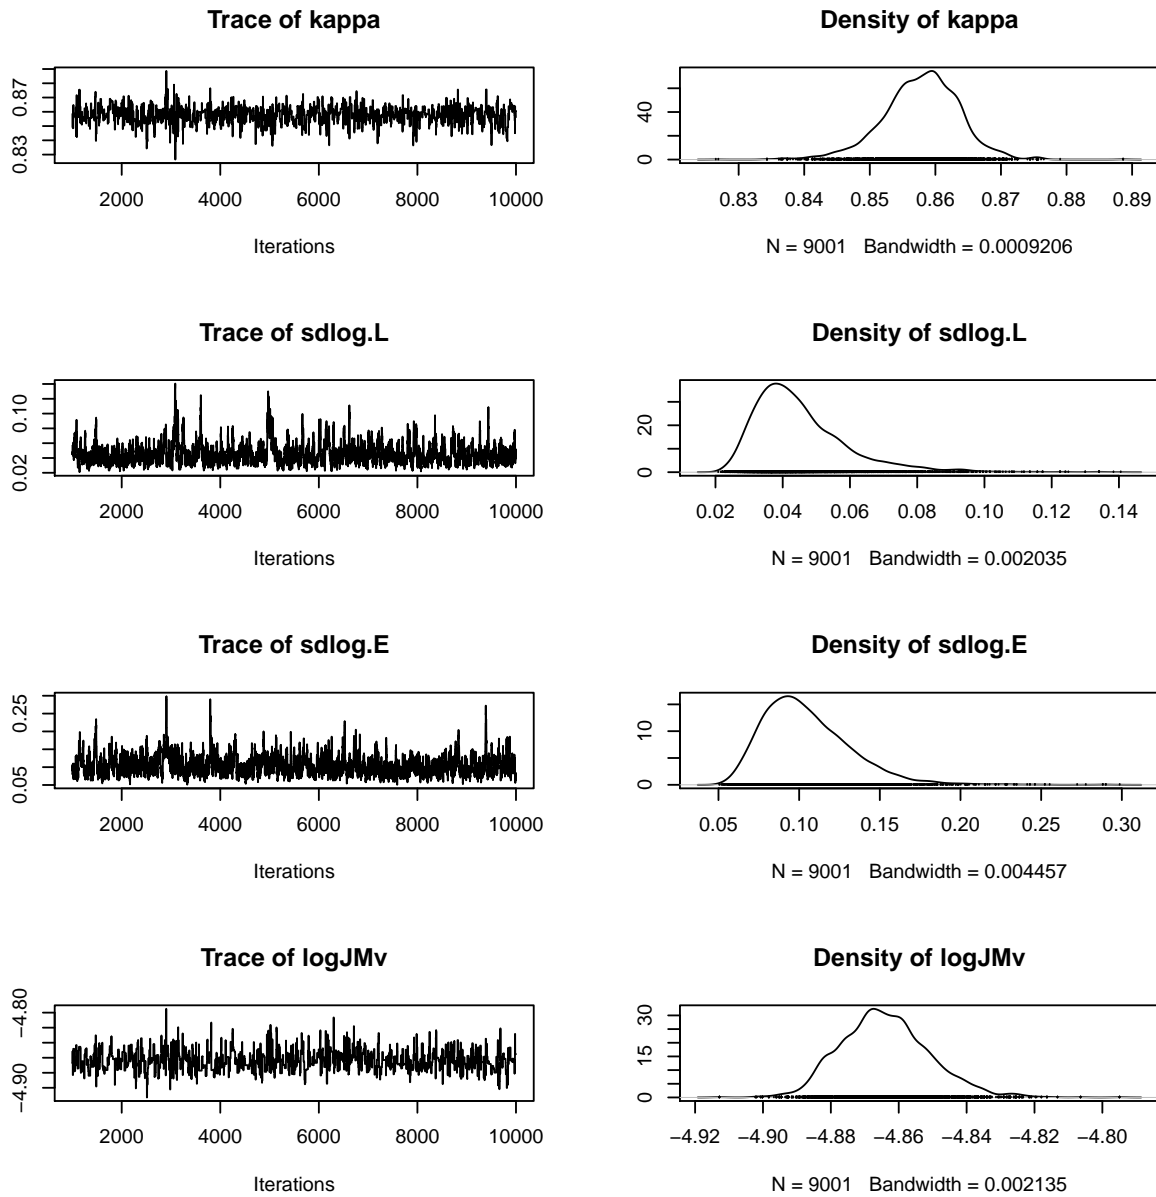

Figure 2: MCMC traces and marginal distribution for 2 observation and 2 primary model parameters estimated for the DEBKiss model.

195 Once mixing and convergence have been assessed, the next, very important, diagnostic to check is  
196 the prior-posterior overlap. Priors in Bayesian analyses can be double edged swords – they allow  
197 us to incorporate previous knowledge and constraints into our process in a formal way. However  
198 it is possible to inject more prior information than one means to through the prior. If you don't  
199 have good information about a parameter value, you ideally want to choose a “vague” prior so that  
200 the information in your data can drive the posterior results. Thus it is always a good idea to plot  
201 the marginal posterior distribution together with the marginal prior to confirm that your choice of

202 prior is not influencing your posterior more than you intended. In our example, even though we  
203 knew the values that (Jager et al., 2013) had previously reported for both parameters, we wanted  
204 to incorporate as little additional information as possible in our priors. In Figure 3 we show the  
205 marginal posterior distribution for each parameter (in black) overlaid with the prior distribution  
206 (in red). Notice that across all 4 panels the red line lies across the very bottom of the panel – the  
207 priors have very little mass in the areas corresponding to the posterior distribution. In all cases the  
208 data seem to be informative for the parameters and the posteriors different from the priors.

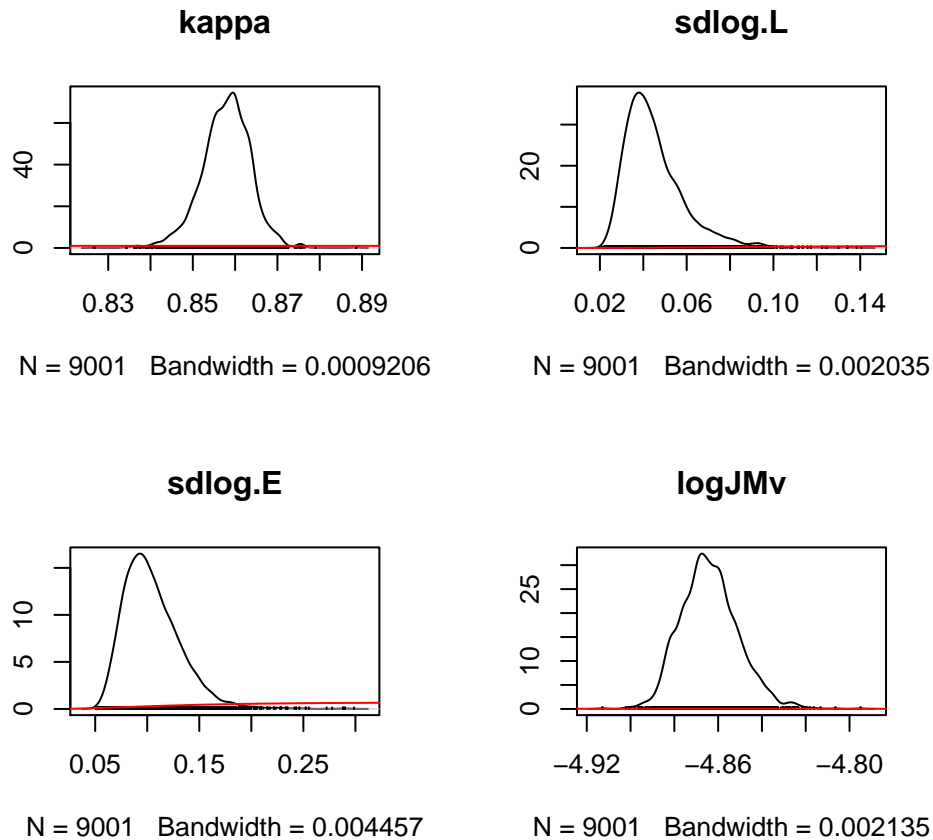

Figure 3: Marginal posterior samples of parameters (black lines) plotted with prior distributions (red). Notice that in all cases the prior is very different from the prior and the data are informative for all parameters.

209 We also typically examine the full joint posterior distribution by visualizing the pairwise joint distri-  
210 butions (e.g. Figure 4). The pairwise plots can give additional indications about the identifiability  
211 of individual parameters, independent of the others. In this example we can see that the correla-  
212 tion between our estimated parameters is overall very low, with the strongest correlation being (not  
213 surprisingly) between  $\kappa$  and  $\ln(J_M^v)$ . This is often the case. For nonlinear systems such as these,  
214 often the observation parameters are not highly correlated with the primary parameters, but the  
215 model parameters themselves may be. Very strong correlations between parameters can indicate  
216 that the data are not fully informative for each parameter individually – for example it may be  
217 that the quotient or product is very tightly constrained by the available data, but the marginal  
218 uncertainty in the individual parameters is higher. This is not necessarily problematic, per se, but



219 should be kept in mind when using and interpreting posterior samples. Further, some patterns  
220 in the posterior, such as extreme nonlinear patterns (“banana” shapes, etc.) can indicate that  
221 parameters are not well constrained. For an example of this for DEB models see Johnson et al.  
222 (2013).

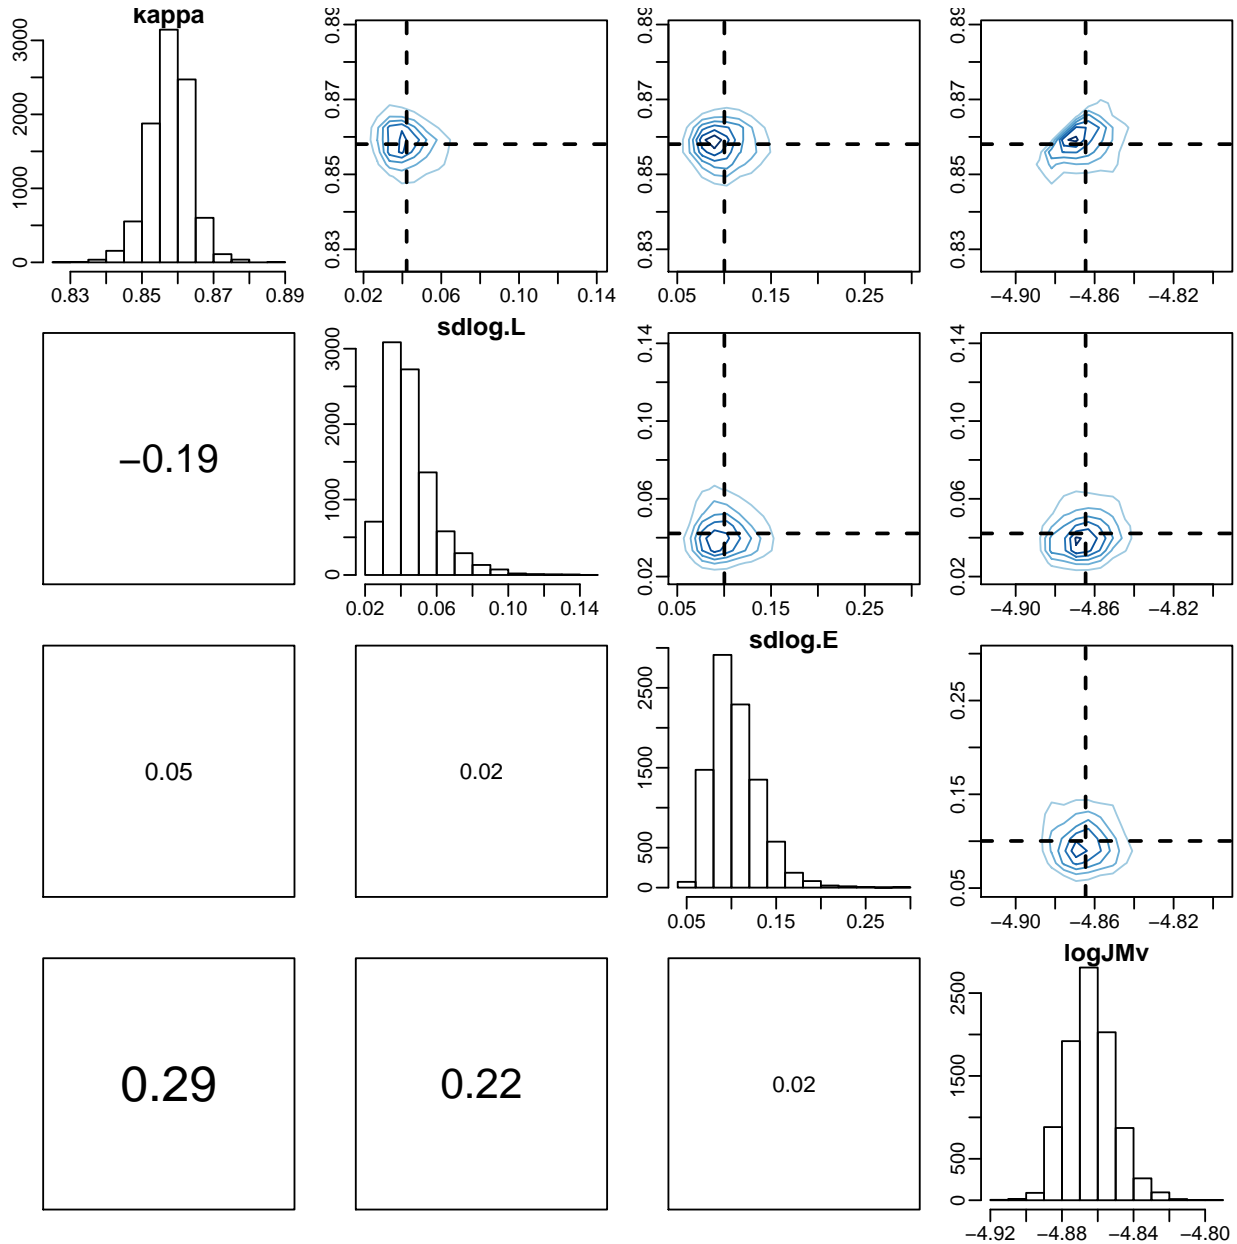

Figure 4: Joint samples from the full posterior of the 2 observation and 2 primary model parameters estimated for the DEBKiss model.

### 223 Posterior estimates of parameters

224 Now that we feel confident in the convergence of the chains and that our parameters are well  
225 identified we can interpret and present the inferred parameters, including the posterior uncertainties.

226 Further, we can use the posterior distribution of parameters to obtain the posterior distributions  
227 of other functions of the parameters, such as the trajectories of the system.

228 In a Bayesian analysis we often report the marginal highest posterior density (HPD) interval or  
229 credible interval, which are the Bayesian analogs to confidence intervals. In Figure 5 we show a  
230 graphical representation of the HPD intervals for the two primary parameters that we estimated.  
231 The shaded region corresponds to the HPD region (i.e., 95% of the posterior weight), and the HPD  
232 interval thus corresponds to the locations of the edges of the region. We indicate the posterior  
233 mean, often used as the point estimate for the parameter, using a solid line. For comparison we  
234 also indicate the “true” parameter (i.e., the estimate obtained by Jager et al. (2013)). Note that  
235 Jager et al. (2013) fit the model via maximum likelihood assuming normal errors on data that  
236 has been square-root transformed. This is a very different assumption about the underlying data  
237 model and is likely part of the reason for the discrepancy. The extra data from other experimental  
238 treatment groups would also provide additional information about parameter values.

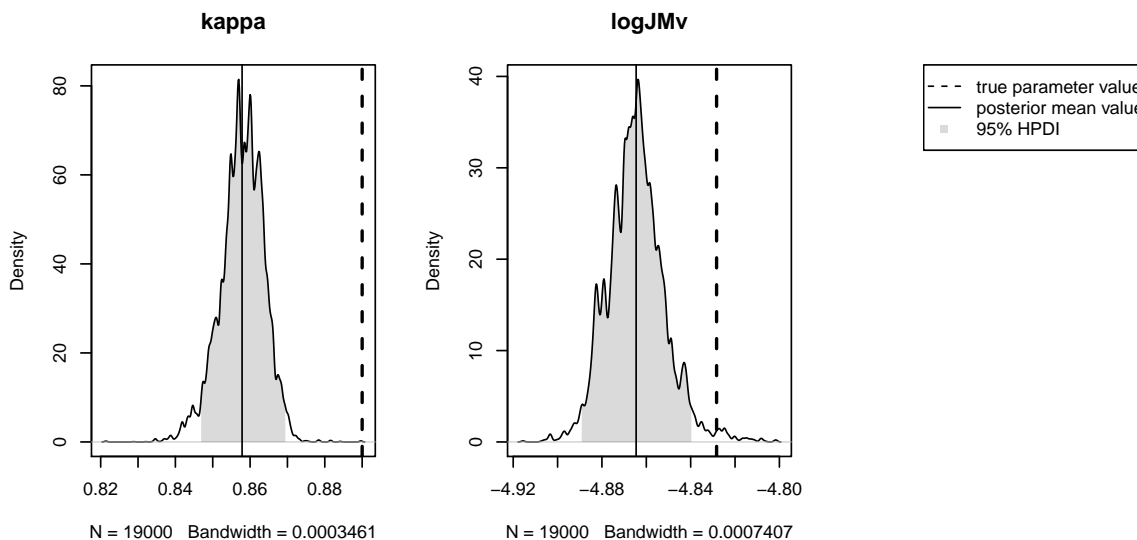

Figure 5: Marginal posterior distributions of two primary parameters  $\kappa$  and  $\ln(J_M^v)$ . Shaded areas indicate the 95% highest posterior density (HPD) region. The posterior mean is indicated with a solid line, and the “true” parameter (i.e., the estimate obtained by Jager et al. (2013)). Note that Jager et al. (2013) fit the model via maximum likelihood, assuming normal errors on data that has been square-root transformed, compared to our assumption of log-normal errors.

239 Finally, we can construct and visualize the posterior distributions of any functions of the parameters.  
240 For this example, we focus on the posterior distribution of the trajectories of the sets of differential  
241 equations. To obtain the posterior distribution of trajectories requires solving the set of differential  
242 equations with the parameters set to the estimated values in the posterior sample. For instance,  
243 in this example we collected  $N = 20000$  samples of the posterior distribution of parameters. We  
244 discarded the first 1000 as burn-in (because for part of that the chain had not yet converged),  
245 leaving 19000 samples. We then “thinned” these samples (that is sub-sampled them), taking every  
246 10th sample. This leaves 1900 parameter samples. For each of these samples we take the pair or  
247 primary parameter estimates together with the fixed parameters and initial conditions and solve  
248 the DEs. After repeating this for all 1900 samples we have 1900 trajectories of the system. We can

249 obtain the mean behavior by taking the mean at each time point in the trajectory across the 1900  
250 samples. Similarly we can calculate the credible intervals by obtaining the appropriate values of  
251 the quantiles at each time point. The posterior mean and credible intervals of the trajectories for  
252 our example are shown in Figure 6. Notice that this fit is slightly different than the fit obtained by  
253 Jager et al. (2013). In particular this fit slightly over-estimates the egg production, whereas Jager  
254 et al. (2013) slightly under-estimate egg production. Both give similar fits for the length.

255 Note that, unlike most methods for obtaining uncertainty estimates of parameters (e.g. obtained  
256 via maximum likelihood or least squares) we do not need to assume that the parameters are approx-  
257 imately multivariate normal. Although that assumption may not be far off for the simple example  
258 here, there are certainly cases where that assumption is a poor representation of the posterior  
259 distribution, and where assuming the parameters are jointly normal would result in very different  
260 predictions of the system trajectories.

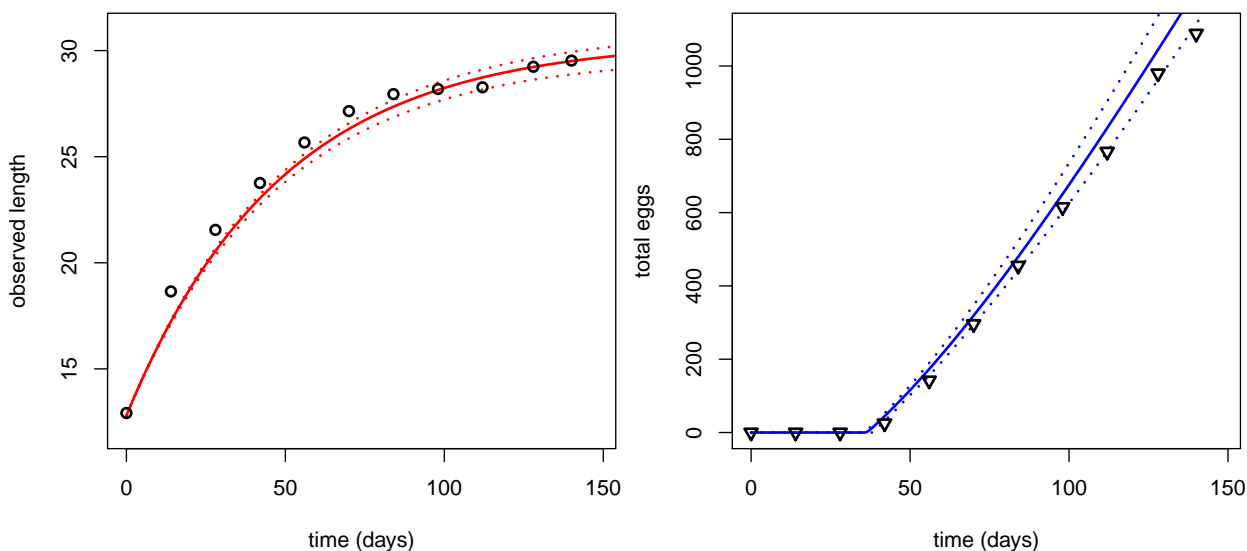

Figure 6: Posterior mean and 95% credible interval (CI) of the predicted growth and reproduction from the DEBKiss model plotted with the pond snail data. Solid lines indicate the posterior mean, and dotted lines the edges of the 95% CI.

## 261 4 Case Study 2: The Standard DEB Model

262 For our second case study we attempt to replicate the DEBtool estimation of growth and repro-  
263 duction parameters for the standard DEB model for the earthworm *Lumbricus terrestris*. For  
264 the sake of simplicity we did not estimate ageing parameters. Data and DEB model parameters  
265 estimated with DEBtool\_M ([https://github.com/add-my-pet/DEBtool\\_M](https://github.com/add-my-pet/DEBtool_M)) in MATLAB R2014b  
266 (MathWorks, Inc.) were obtained from the add-my-pet database. To assess parameter identifi-  
267 ability and the precision of the posterior parameter estimates this case study is uses simulated  
268 observations based on the AmP parameters, rather than the original earthworm data from Butt  
269 (1993). Empirical distributions of DEB parameters for the construction of priors were obtained  
270 using AmPtool (<https://github.com/add-my-pet/AmPtool>).

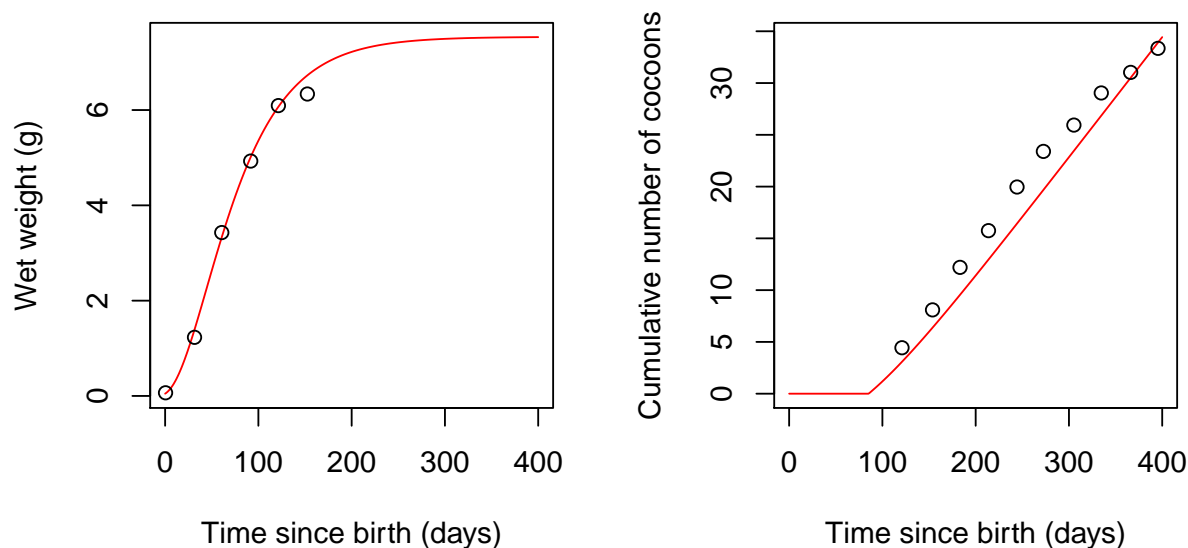

Figure 7: Earthworm growth and reproduction data (Butt, 1993) plotted with predictions from the standard DEB model based on parameters for *Lumbricus terrestris* from the AmP database.

#### 271 4.1 Bayesian parameter estimation

272 We implemented the standard DEB model in terms of scaled energy density  $e$ , scaled length  $l$ , and  
273 scaled maturity and reproductive buffer  $u_H$  and  $u_R$ , respectively, (Kooijman, 2010, Table 2.5) as  
274 functions compliant with the ODE solvers provided by the `deSolve` package Soetaert et al. (2010).  
275 Further R functions to compute boundary values for the state variables from DEB parameters (Kooi-  
276 jman, 2009) were adapted from DEBtool routines and are available in the R package DEButilities  
277 (<https://doi.org/10.5281/zenodo.1162331>) which we provide in the supplementary materials.

278 Treating the initial value for the scaled reserve density  $u_E^0$  as parameter dependent (Kooijman, 2009)  
279 necessitates a recalculation of two of the initial values, the scaled length  $l_b$  and maturity at birth  
280  $u_H^b$ , respectively, for the DEB model within the MCMC inference procedure. This computational  
281 step is currently only implemented in a development branch of `deBInfer`, which is available on  
282 github (<https://github.com/pboesu/debinfer/tree/recalc-inits>) and provided in the supplementary  
283 materials.

284 Initial inference runs highlighted parameter identifiability issues, in particular the strong, non-linear  
285 correlation between  $L_m$ ,  $\{\dot{p}_{Am}\}$  and  $\dot{v}$  made it impossible to estimate  $[E_G]$ . This could partially be  
286 resolved by using informative priors based on the empirical distribution of parameters in the AmP  
287 database (see below).

288 The strong parameter correlations further resulted in slow mixing of the MCMC chain, necessitating  
289 a large number of samples to explore the posterior distribution. We therefore conducted inference  
290 for this model using a compiled ODE model implemented in C to speed up inference.

291 We ran three separate MCMC chains of 150000 samples each. We discarded the first 10000 samples  
292 of each chain and thinned the remaining samples retaining every 10th sample.

#### 293 4.1.1 Prior distributions

294 Priors on the parameters were chosen to be weakly informative, based on the principle that priors  
295 should contain enough information to rule out unreasonable parameter values but not values that  
296 might make sense. Hard bounds were used only where dictated by DEB theory. We further aimed  
297 to translate the pseudodata approach of the covariation method (Lika et al., 2011) into our choices  
298 of prior distributions and their location and scale parameters. Specific prior choices are detailed in  
299 Table 2.

#### 300 4.1.2 Data model and likelihood

301 The state variables of the DEB model are abstract quantities that are not directly observable, but  
302 can be mapped to observable quantities using auxiliary parameters. We used the following mappings  
303 between the so-called zero-variate observable quantities and model states and parameters:

$$\begin{aligned}Ww_0 &= u_E^0 \frac{v^2}{g^2} k_M^3 p_{Am} \frac{w_E}{\mu_E d_E} \\Ww_b &= (l_b L_m)^3 (1 + f\omega) \\Ww_p &= (l_p L_m)^3 (1 + f\omega) \\a_b &= \tau_b / \dot{k}_M \\a_p &= \tau_b + \rho_B^{-1} \log \frac{l_\infty - l_b}{l_\infty - l_p}\end{aligned}$$

304 where  $u_E^0$ ,  $l_*$ , and  $\tau_b$  were calculated following Kooijman (2009).

Further, the time series of wet weight  $Ww(t)$  and reproductive output  $R(t)$  were mapped from the model using the equations

$$\begin{aligned}Ww(t) &= (l(t)L_m)^3 (1 + f * \omega) \\R(t) &= \kappa_R * u_R(t) / u_E^0.\end{aligned}$$

305 The full likelihood of error at time  $t$  is as follows

Table 2: Prior distributions used for parameter inference in the standard DEB model.

| parameter              |           | prior distribution | parameters                                              | reasoning                                                                                 |
|------------------------|-----------|--------------------|---------------------------------------------------------|-------------------------------------------------------------------------------------------|
| $L_m$                  | L_m       | truncated normal   | $a = 0; \mu = 1, \sigma^2 = 1$                          | weakly informative prior in the absence of species specific maximum length or weight data |
| $\{\dot{p}_{Am}\}$     | p_Am      | normal             | $\mu = 900; \sigma^2 = 300$                             | weakly informative prior based on AmP collection                                          |
| $\dot{v}$              | v         | truncated normal   | $a = 0; \mu = 0.2, \sigma^2 = 0.2$                      | weakly informative prior based on generalised animal                                      |
| $\kappa$               | kap       | Beta               | $\alpha = \beta = 2$                                    | bounded on [0,1], regularizing away from bounds                                           |
| $[E_G]$                | E_G       | truncated normal   | $a = \frac{d_V \mu_V}{w_E}; \mu = 4200; \sigma^2 = 100$ | informative prior based on theoretical lower bound and AmP data scaled for $d_V = 0.16$   |
| $E_H^b$                | E_Hb      | truncated normal   | $a = 0; \mu = 0; \sigma^2 = 100$                        | weakly informative prior regularizing towards 0                                           |
| $E_H^p$                | E_Hp      | truncated normal   | $a = 0; \mu = 1000; \sigma^2 = 1000$                    | weakly informative prior regularizing to values $\approx 1000$                            |
| $\ln \varepsilon_{Ww}$ | sdlog.EWw | truncated normal   | $a = 0; \mu = 0.1; \sigma^2 = 0.1$                      | weakly informative prior regularizing towards 0                                           |
| $\ln \varepsilon_R$    | sdlog.R   | truncated normal   | $a = 0; \mu = 0.1; \sigma^2 = 0.1$                      | weakly informative prior regularizing towards 0                                           |

Table 3: Fixed parameters used for inference in the standard DEB model. Values are based on the AmP entry for *Lumbricus terrestris*. No uncertainty estimates for ages and weights at stage transitions in *L. terrestris* were available in the literature. We therefore assumed a fixed standard deviation of 1% of the corresponding mean for those values.

| parameter         | value                      |
|-------------------|----------------------------|
| $\bar{k}_J$       | k_J 0.002 cm/d             |
| $T_A$             | T_A 5000 K                 |
| $T_{ref}$         | T_ref 293.15 K             |
| $f$               | f 1                        |
| $w_E$             | w_E 23.9 g/mol             |
| $d_V$             | d_v 0.16 g/cm <sup>3</sup> |
| $d_E$             | d_E 0.16 g/cm <sup>3</sup> |
| $\mu_E$           | mu_E 550000 J/mol          |
| $\mu_V$           | mu_v 500000 J/mol          |
| $\kappa_R$        | kap_R 0.95                 |
| $\sigma_{a^*}^2$  | $0.01 \times \mu_{a^*}$    |
| $\sigma_{Ww^*}^2$ | $0.01 \times \mu_{Ww^*}$   |

$$\begin{aligned}
 \mathcal{L} = & \Delta_b \Delta_p \Delta_H \times \\
 & \text{truncnorm}(\tilde{W}w_0 | Ww_0, \sigma_{Ww_0}^2, a = 0, b = \infty) \times \\
 & \text{truncnorm}(\tilde{W}w_b | Ww_b, \sigma_{Ww_b}^2, a = 0, b = \infty) \times \\
 & \text{truncnorm}(\tilde{W}w_p | Ww_p, \sigma_{Ww_p}^2, a = 0, b = \infty) \times \\
 & \text{truncnorm}(\tilde{a}_b | a_b, \sigma_{a_b}^2, a = 0, b = \infty) \times \\
 & \text{truncnorm}(\tilde{a}_p | a_p, \sigma_{a_p}^2, a = 0, b = \infty) \times \\
 & \prod_t \text{lognormal}(\tilde{W}w(t) | \ln Ww(t), \ln \varepsilon_{Ww}) \times \\
 & \prod_t \text{lognormal}(\tilde{R}(t) | \ln R(t), \ln \varepsilon_R)
 \end{aligned} \tag{5}$$

306 where the constraints on the parameter space follow from theoretical considerations detailed in Lika  
 307 et al. (2014) about the animal reaching the stage transitions at birth and puberty:

$$\Delta_b = \begin{cases} 0 & \text{for } l_b \geq f \text{ or } k v_H^b \geq \frac{f}{g+f} l_b^2 (g + l_b) \\ 1 & \text{otherwise} \end{cases} \tag{6}$$

$$\Delta_p = \begin{cases} 0 & \text{for } k v_H^p \geq f(f - l_T)^2 \\ 1 & \text{otherwise} \end{cases} \tag{7}$$

$$\Delta_H = \begin{cases} 0 & \text{for } H_b \geq H_p \\ 1 & \text{otherwise} \end{cases} \tag{8}$$

## 308 4.2 Results: Standard DEB Model

309 Initial inference runs highlighted parameter identifiability issues, in particular the strong, non-linear  
310 correlation between  $L_m$ ,  $\{\dot{p}_{Am}\}$  and  $\dot{v}$  (see the banana-shaped contours in the joint density plots for  
311 the variables in Figure 8) made it impossible to estimate  $[E_G]$ , even when using informative priors  
312 based on the empirical distribution of parameters in the AmP database. We therefore present  
313 inferences for a model where  $[E_G]$  was fixed at the value of  $4150 \text{ J/cm}^3$  (Figure 9).

314 Despite the strong correlations, the AmP parameter values were recovered within the 95% highest  
315 posterior density interval, although the posterior means and modes diverged substantially from the  
316 AmP parameter values for  $L_m$ ,  $\{\dot{p}_{Am}\}$ , and  $\dot{v}$ , and to a lesser extent for  $E_H^b$  (Figure 10).

317 Posterior trajectories for the earthworm DEB model (Figure 11) further indicate that the parameter  
318 identifiability issues encountered here are a structural property of the model, rather than a result of  
319 poor statistical fit. The posterior distribution of model trajectories is relatively narrow on the data  
320 scale, which is well constrained by the observations, but wide on the scale of the state variables.

## 321 5 Discussion

322 DEB theory and related bioenergetic models such as the DEBkiss framework have the potential  
323 to unify biological theory across levels of organization (Nisbet et al. 2000). However, to realize  
324 this potential robust methods are needed to connect the theoretical predictions with the inherently  
325 variable and noisy biological data.

326 We here demonstrate how DEB and DEBkiss parameters can be estimated in a Bayesian framework,  
327 a coherent, effective, and well-established approach, using the freely available `deBInfer` package  
328 in R. The Bayesian approach is particularly useful for DEB models as it provides a fairly straight-  
329 forward way to incorporate prior information and at the same time provides a means to quantify  
330 uncertainty in parameters and predictions. DEB theory in its very core is focused on the individual  
331 animal, and the role of individual trait heterogeneity is increasingly recognized as an important  
332 factor underlying ecological dynamics (e.g. Cam et al., 2002; Vindenes et al., 2008; Jenouvrier et al.,  
333 2015). The Bayesian approach, in principle, provides a conceptually straightforward avenue for hi-  
334 erarchical inference for bioenergetic models, thereby opening a door to better understanding causes  
335 and effects of individual heterogeneity of metabolic traits. However, our results also highlight the  
336 difficulty of identifying DEB model parameters which serves as a reminder that fitting these models  
337 requires statistical caution.

338 In particular, we were not able to simultaneously estimate the same number of parameters for the  
339 standard DEB model for *Lumbricus terrestris* as are presented in the corresponding AmP entry,  
340 even when using priors based on AmP information.

341 Both the Bayesian approach presented here, and the DEBtool procedure make use of expert opin-  
342 ion to constrain the parameter estimation. The former through the choice of particular prior  
343 distributions and likelihoods, the latter by using pseudodata and setting weight coefficients for the  
344 least-squares estimation. Furthermore, the weighted least-squares method underlying the DEBtool  
345 estimation procedure does in principle provide variances and approximate covariances on param-  
346 eter estimates, however, these are rarely if ever reported, and are not currently part of the AmP  
347 database. To better understand the sensitivities of parameter estimates we would encourage all



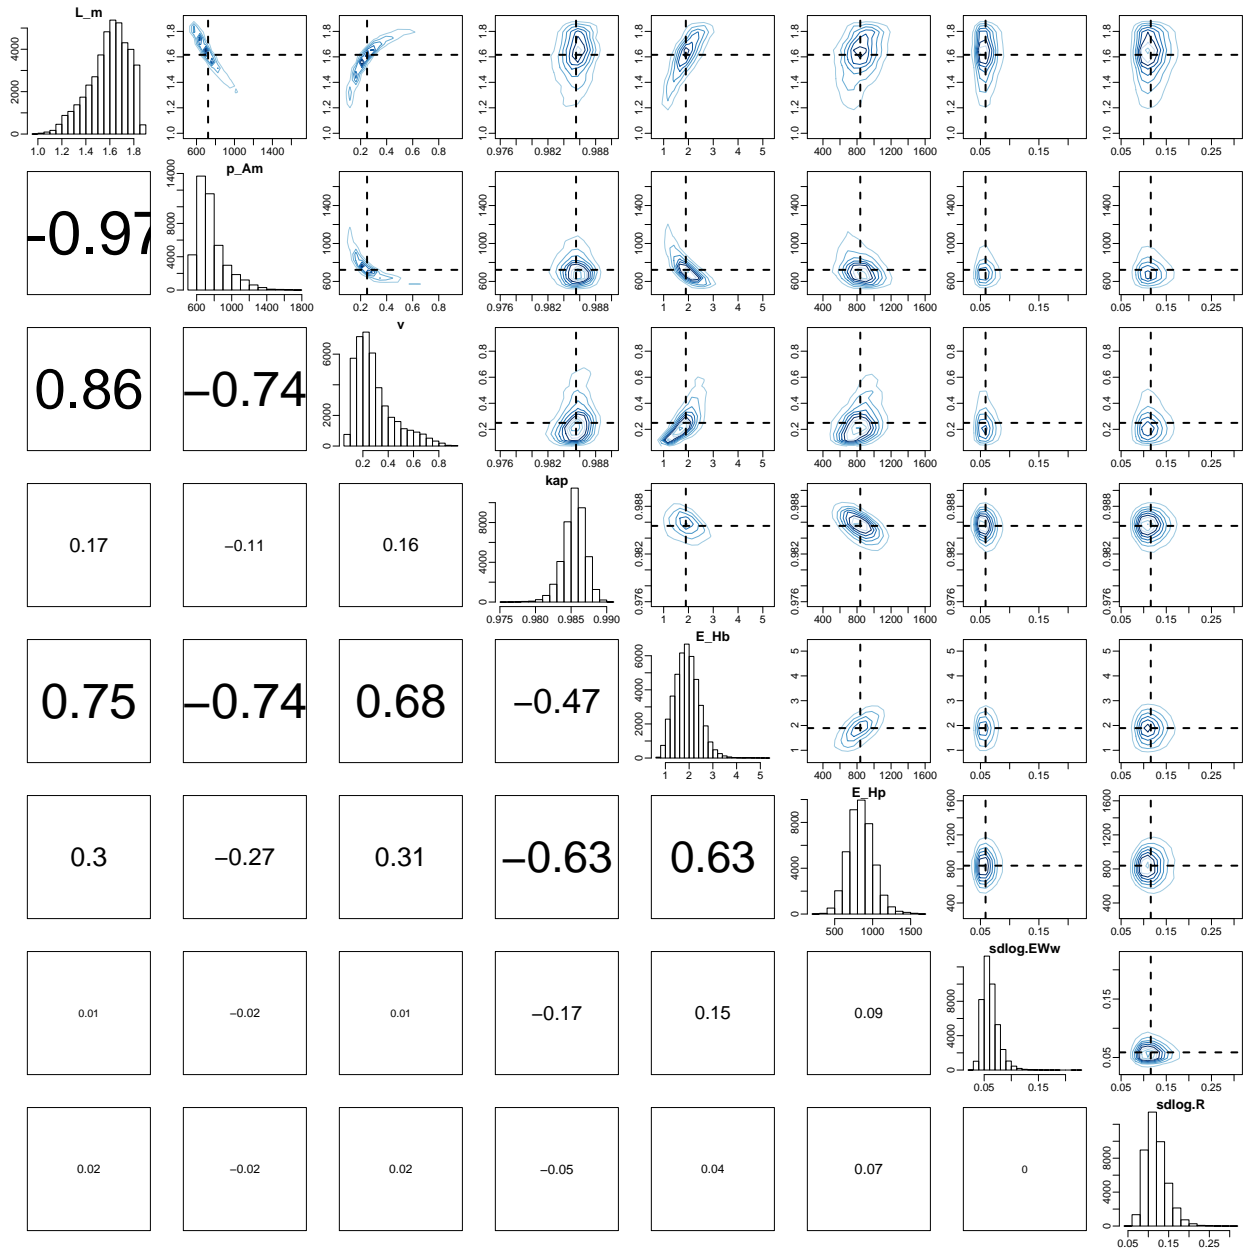

Figure 8: Pairwise correlations of posterior parameter estimates for the standard DEB model.  $E_G$  was fixed at  $4150 \text{ J/cm}^3$ .

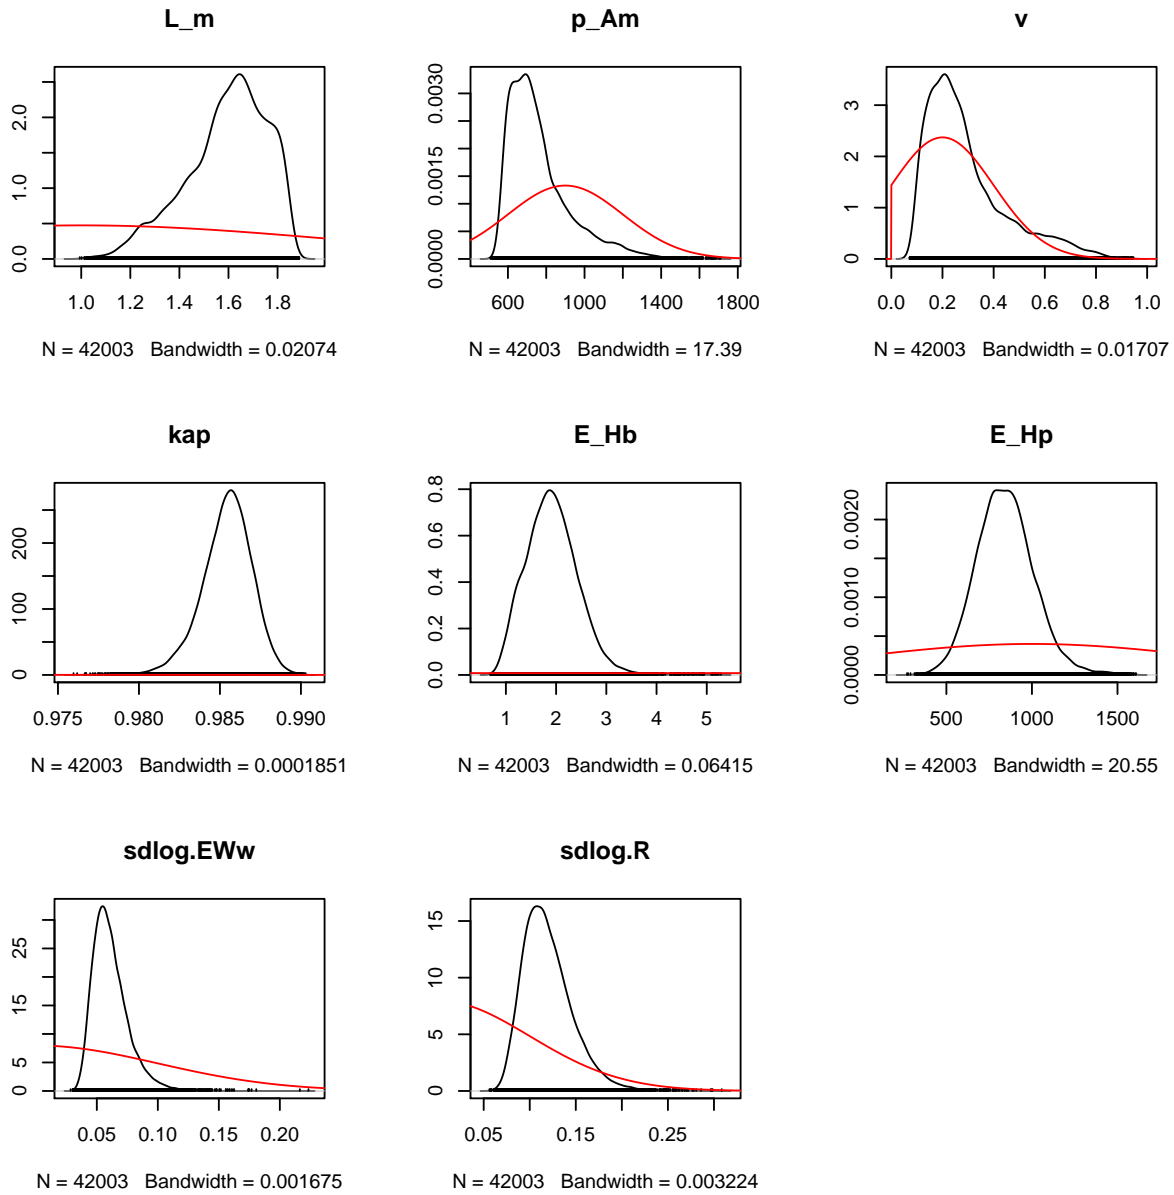

Figure 9: Even with a fixed value of  $E_G$  the data likelihood provided little information about the values of  $\dot{v}$ ,  $L_m$ , and  $\{\dot{p}_{Am}\}$ , as is apparent from the substantial overlap between posterior and prior densities .

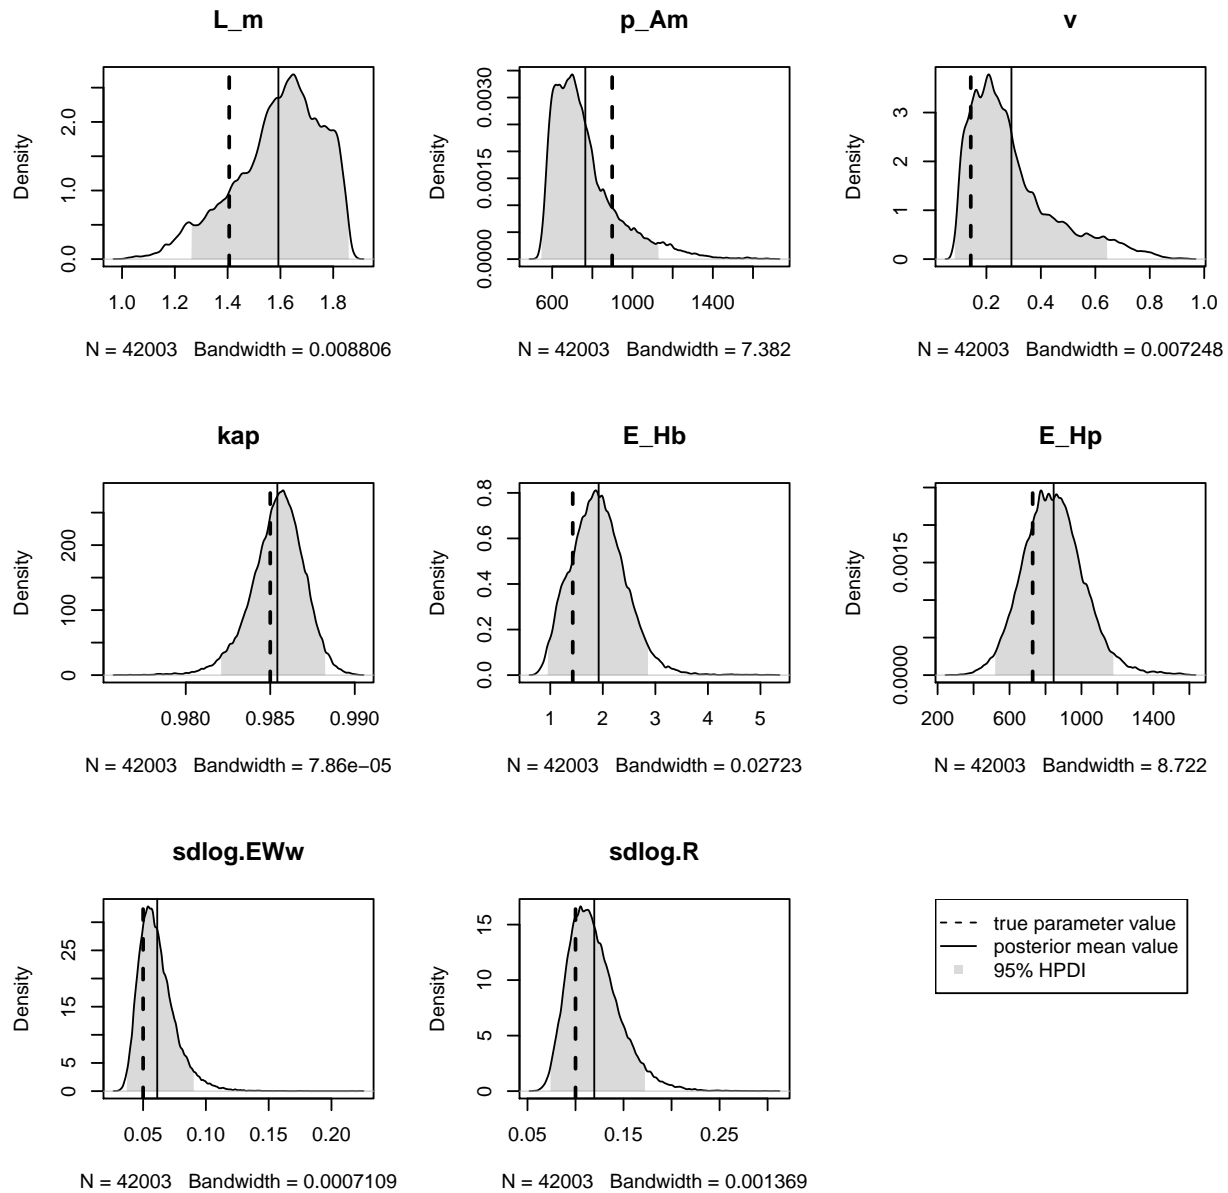

Figure 10: Eventhough several parameters of the standard DEB model were only weakly identified, the true values of all free parameter were recovered within the 95% highest posterior density interval.

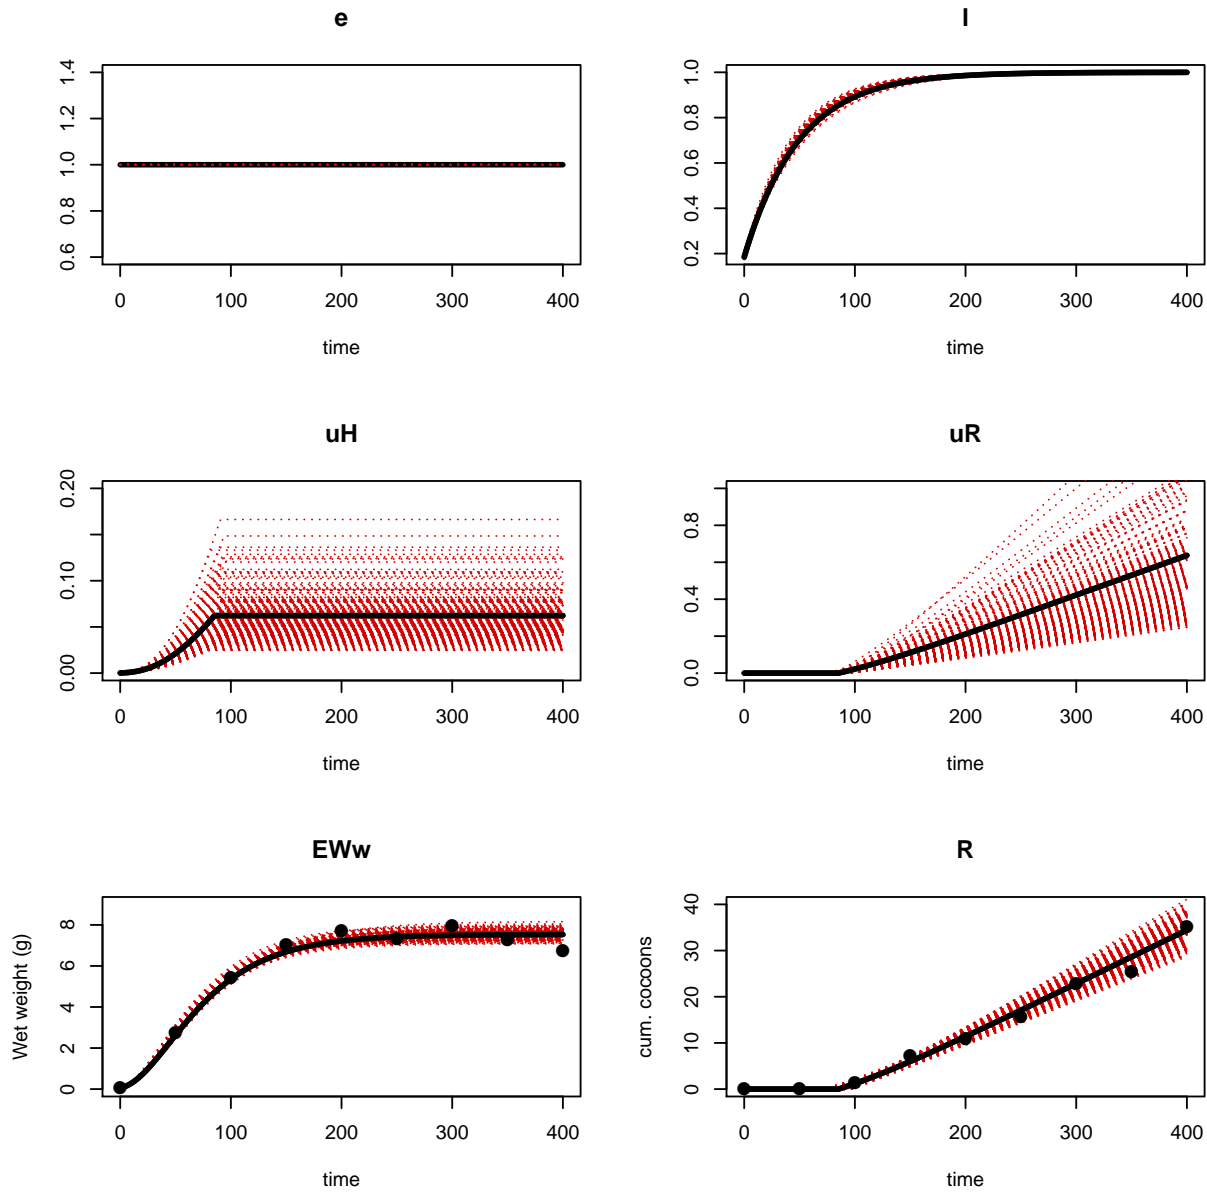

Figure 11: Posterior trajectories for the earthworm DEB model. The posterior distribution of model trajectories is relatively narrow on the data scale, but wide on the scale of the state variables. This indicates that the weak identifiability of several parameters is structural, rather than a consequence of poor statistical fit. The red lines are a random sample of 500 posterior trajectories. The black line represents the "true" trajectories on which the simulated observations are based, black circles show the simulated univariate data used in the inference procedure.

348 DEB practitioners to report choices made to constrain the parameter estimation, as well as variance  
349 and covariance estimates for estimated parameters.

## 350 6 Acknowledgements

351 The authors were supported by the US National Science Foundation (Grant PLR-1341649). We  
352 thank Sadie Ryan and the participants of the 5th international symposium on Dynamic Energy  
353 Budget theory for comments and discussions on earlier versions of this work.

## 354 7 Code and Data availability

355 The earthworm data and parameters were obtained from the add-my-pet library (AmP;  
356 [http://bio.vu.nl/thb/deb/deblab/add\\_my\\_pet/](http://bio.vu.nl/thb/deb/deblab/add_my_pet/)) entry *Lumbricus terrestris* version 2015/12/07,  
357 Code and derived data sets for this paper are available online.

- 358 • DEButilities 0.1.0 is archived on zenodo  
359 (<https://doi.org/10.5281/zenodo.1162331>)
- 360 • deBInfer 0.4.1 is available on CRAN (<https://CRAN.R-project.org/package=deBInfer>)
- 361 • deBInfer 0.4.1.9000-recalc-inits is available on github  
362 (<https://github.com/pboesu/debinfer/tree/recalc-inits>)
- 363 • Simulation and inference code for this paper are archived on zenodo  
364 (<https://doi.org/10.5281/zenodo.1162942>)

## 365 References

- 366 R. C. Aster, B. Borchers, and C. H. Thurber. *Parameter Estimation and Inverse Problems*. Academic Press, Amsterdam, 2nd edition, 2011.
- 368 P. H. Boersch-Supan, S. J. Ryan, and L. R. Johnson. deBInfer: Bayesian inference for dynamical  
369 models of biological systems in R. *Methods in Ecology and Evolution*, 8(4):511–518, 2017.
- 370 D. Brewer, M. Barenco, R. Callard, M. Hubank, and J. Stark. Fitting ordinary differential equa-  
371 tions to short time course data. *Philosophical Transactions of the Royal Society of London A: Mathematical, Physical and Engineering Sciences*, 366(1865):519–544, 2008.
- 373 S. Brooks, A. Gelman, G. Jones, and X.-L. Meng. *Handbook of Markov Chain Monte Carlo*. CRC Press, Boca Raton, FL, 2011.
- 375 K. Butt. Reproduction and growth of three deep-burrowing earthworms (lumbricidae) in laboratory  
376 culture in order to assess production for soil restoration. *Biology and Fertility of Soils*, 16(2):  
377 135–138, 1993.
- 378 E. Cam, W. A. Link, E. G. Cooch, J. Monnat, and E. Danchin. Individual covariation in life-history  
379 traits: Seeing the trees despite the forest. *The American Naturalist*, 159(1):96–105, 2002. doi:  
380 10.1086/324126.

- 381 J. S. Clark. *Models for Ecological Data: An Introduction*. Princeton University Press, Princeton,  
382 New Jersey, USA, 2007.
- 383 F. C. Coelho, C. T. Codeço, and M. G. M. Gomes. A Bayesian framework for parameter estimation  
384 in dynamical models. *PloS one*, 6(5):e19616, 2011.
- 385 A. Gelman, F. Bois, and J. Jiang. Physiological pharmacokinetic analysis using population modeling  
386 and informative prior distributions. *Journal of the American Statistical Association*, 91(436):  
387 1400–1412, 1996.
- 388 A. Gelman, J. B. Carlin, H. S. Stern, and D. B. Rubin. *Bayesian Data Analysis*. Chapman &  
389 Hall/CRC, 2003.
- 390 W. R. Gilks, S. Richardson, and D. Spiegelhalter. *Markov chain Monte Carlo in practice*. CRC  
391 press, 1995.
- 392 N. T. Hobbs and M. B. Hooten. *Bayesian models: a statistical primer for ecologists*. Princeton  
393 University Press, Princeton, New Jersey, USA, 2015.
- 394 T. Jager and E. I. Zimmer. Simplified dynamic energy budget model for analysing ecotoxicity data.  
395 *Ecological Modelling*, 225:74–81, 2012.
- 396 T. Jager, E. H. Heugens, and S. A. Kooijman. Making sense of ecotoxicological test results: towards  
397 application of process-based models. *Ecotoxicology*, 15(3):305–314, 2006.
- 398 T. Jager, B. T. Martin, and E. I. Zimmer. Debkiss or the quest for the simplest generic model of  
399 animal life history. *Journal of Theoretical Biology*, 328:9 – 18, 2013.
- 400 S. Jenouvrier, C. Péron, and H. Weimerskirch. Extreme climate events and individual heterogeneity  
401 shape life-history traits and population dynamics. *Ecological Monographs*, 85(4):605–624, 2015.
- 402 L. R. Johnson and C. J. Briggs. Parameter inference for an individual based model of chytridiomy-  
403 cosis in frogs. *Journal of theoretical biology*, 277(1):90–98, 2011.
- 404 L. R. Johnson, L. Pecquerie, and R. M. Nisbet. Bayesian inference for bioenergetic models. *Ecology*,  
405 94(4):882–894, 2013.
- 406 S. Kooijman. Waste to hurry: dynamic energy budgets explain the need of wasting to fully exploit  
407 blooming resources. *Oikos*, 122(3):348–357, 2013.
- 408 S. A. Kooijman. What the egg can tell about its hen: embryonic development on the basis of  
409 dynamic energy budgets. *Journal of Mathematical Biology*, 58(3):377–394, 2009.
- 410 S. A. L. M. Kooijman. *Dynamic energy budget theory for metabolic organisation*. Cambridge  
411 University Press, 2010.
- 412 K. Lika, M. R. Kearney, V. Freitas, H. W. van der Veer, J. van der Meer, J. W. Wijsman, L. Pec-  
413 querie, and S. A. Kooijman. The “covariation method” for estimating the parameters of the  
414 standard dynamic energy budget model i: philosophy and approach. *Journal of Sea Research*,  
415 66(4):270–277, 2011.
- 416 K. Lika, S. Augustine, L. Pecquerie, and S. A. Kooijman. The bijection from data to parameter  
417 space with the standard deb model quantifies the supply–demand spectrum. *Journal of theoretical*  
418 *biology*, 354:35–47, 2014.

- 419 J. L. Maino, M. R. Kearney, R. M. Nisbet, and S. A. Kooijman. Reconciling theories for metabolic  
420 scaling. *Journal of Animal Ecology*, 83(1):20–29, 2014.
- 421 B. T. Martin, E. I. Zimmer, V. Grimm, and T. Jager. Dynamic energy budget theory meets  
422 individual-based modelling: a generic and accessible implementation. *Methods in Ecology and*  
423 *Evolution*, 3(2):445–449, 2012.
- 424 I. M. Smallegange, H. Caswell, M. E. Toorians, and A. M. Roos. Mechanistic description of  
425 population dynamics using dynamic energy budget theory incorporated into integral projection  
426 models. *Methods in Ecology and Evolution*, 8(2):146–154, 2017.
- 427 M. J. Smith, D. P. Tittensor, V. Lyutsarev, and E. Murphy. Inferred support for disturbance-  
428 recovery hypothesis of North Atlantic phytoplankton blooms. *Journal of Geophysical Research:*  
429 *Oceans*, 120(10):7067–7090, 2015.
- 430 K. Soetaert, T. Petzoldt, and R. W. Setzer. Solving differential equations in R: package deSolve.  
431 *Journal of Statistical Software*, 33(9):1–25, 2010.
- 432 Y. Vindenes, S. Engen, and B.-E. Sæther. Individual heterogeneity in vital parameters and demo-  
433 graphic stochasticity. *The American Naturalist*, 171(4):455–467, 2008.
- 434 J. Voyles, L. R. Johnson, C. J. Briggs, S. D. Cashins, R. A. Alford, L. Berger, L. F. Skerratt,  
435 R. Speare, and E. B. Rosenblum. Temperature alters reproductive life history patterns in *Ba-*  
436 *trachochytrium dendrobatidis*, a lethal pathogen associated with the global loss of amphibians.  
437 *Ecology and Evolution*, 2(9):2241–2249, 2012.
- 438 E. I. Zimmer, T. Jager, V. Ducrot, L. Lagadic, and S. A. L. M. Kooijman. Juvenile food limitation  
439 in standardized tests: a warning to ecotoxicologists. *Ecotoxicology*, 21(8):2195–2204, Nov 2012.
